# Supplementary material for: An electronic tongue based on conjugated polymers for the discrimination and quantitative detection of tetracyclines
Source: Royal Society of Chemistry journal article supplement (doi:10.1039/d3an01213a), 2023-01-01
Supplement: d3an01213a1.pdf [file d3an01213a1.pdf]

## Supporting Information

### Synthesis of CPs

#### CP1

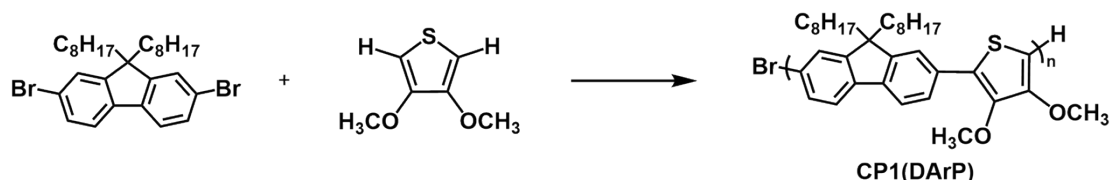

A mixture of 9,9-dioctyl-2,7-dibromofluorene (109.7 mg, 0.20 mmol),  $K_2CO_3$  (166 mg, 1.2 mmol), pivalic acid (20.4 mg, 0.20 mmol), Pd@DMSNs (35.4 mg), and N,N-dimethylacetamide (DMAc, 2 mL) was added to a 10 ml sealed tube. The system was freeze-pump-thaw for three times to remove residual water and air. Then, using a microsyringe, 3,4-dimethoxythiophene (28.8 mg, 0.20 mmol) was carefully added to the tube under a nitrogen atmosphere and the tube was tightly sealed under nitrogen. The system was then heated at 120 °C for 96 hours. After the reaction, tetrahydrofuran (THF) was added to the system to fully dissolve the product, and the supernatant (precipitate is base and catalyst) was collected after centrifugation. THF was then removed by rotary evaporation, and DMAc was removed by vacuum distillation. The resulting solid was dissolved in a small amount of THF (approximately 1 mL) and reprecipitated in anhydrous methanol. The precipitate was collected by centrifugation and washed for three times and then vacuum-dried for 12 hours to obtain 84 mg of solid product.

For CP3 and CP5, thiophene monomers were added together with other raw materials without the need for freeze-pump-thawing. The operating steps for other CPs were the same as CP1, with only the feeding amount and reaction conditions specified later.

#### CP2

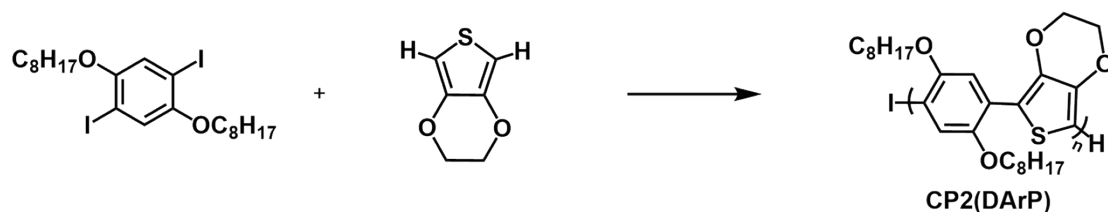

1,4-Diiodo-2,5-bis(2-ethylhexyloxy)benzene (175.9 mg, 0.30 mmol), 3,4-ethylenedioxythiophene (2.6 mg, 0.30 mmol),  $K_2CO_3$  (248.6 mg, 1.8 mmol), pivalic

acid (30.6 mg, 0.30 mmol), Pd@DMSNs (35.4 mg) and DMAc (2 mL) were used during polymerization. The polymerization was carried out at 100 °C for 72 h to yield the product (127 mg).

### CP3

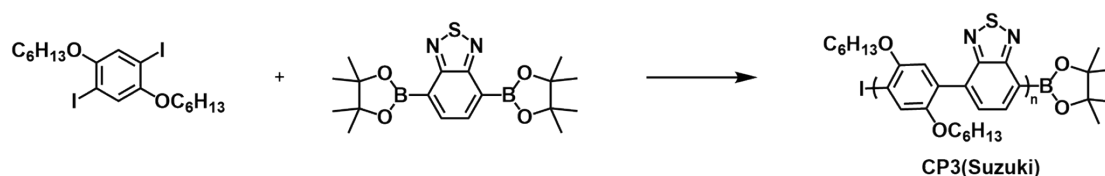

1,4-Diiodo-2,5-bis(hexyloxy)benzene (106.0 mg, 0.20 mmol), 4,7-bis(4,4,5,5-tetramethyl-1,3,2-dioxaborolan-2-yl)-2,1,3-benzothiadiazole (77.6 mg, 0.20 mmol), K<sub>2</sub>CO<sub>3</sub> (96.7 mg, 0.70 mmol), Pd@DMSNs (35.4 mg) and DMAc (2 mL) were used during polymerization. The polymerization was carried out at 80 °C for 48 h to yield the product (46 mg).

### CP4

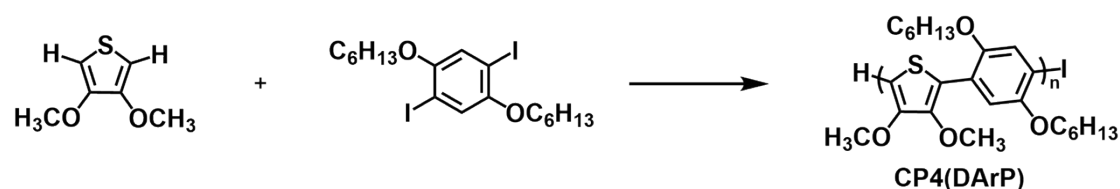

1,4-Diiodo-2,5-bis(hexyloxy)benzene (159.0 mg, 0.30 mmol), 3,4-dimethoxythiophene (43.3 mg, 0.30 mmol), K<sub>2</sub>CO<sub>3</sub> (290.0 mg, 2.1 mmol), pivalic acid (15 mg, 0.15 mmol), Pd@DMSNs (100.0 mg) and DMAc (1.5 mL) were used during polymerization. The polymerization was carried out at 100 °C for 96 h to yield the product (118 mg).

### CP5

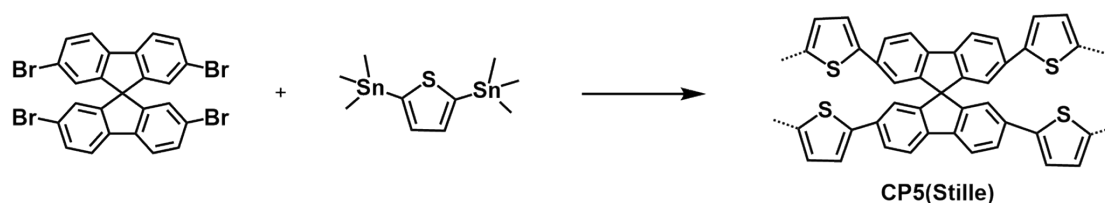

2,2',7,7'-Tetrabromo-9,9'-spirobifluorene (94.8 mg, 0.15 mmol), 2,5-bis(trimethylstannyl)thiophene (123.0 mg, 0.30 mmol), Pd@DMSNs (20.0 mg) and DMAc (2 mL) were used during polymerization. The polymerization was carried out at 100 °C for 120 h to yield the product (49 mg).

## CP6

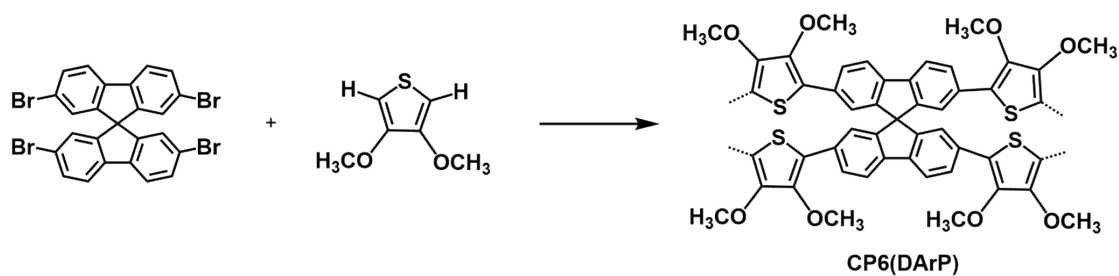

2,2',7,7'-Tetrabromo-9,9'-spirobifluorene (158.0 mg, 0.25 mmol), 3,4-dimethoxythiophene (72.0 mg, 0.50 mmol), potassium acetate (343.4 mg, 3.5 mmol), pivalic acid (25.0 mg, 0.25 mmol), Pd@DMSNs (20.0 mg) and DMAc (2 mL) were used during polymerization. The polymerization was carried out at 100 °C for 120 h to yield the product (82 mg).

Table S1 Summary of structural properties of 6 CPs

| CPs | $M_n$ | PDI  |
|-----|-------|------|
| CP1 | 7008  | 1.55 |
| CP2 | 4136  | 1.76 |
| CP3 | 1394  | 1.15 |
| CP4 | 7842  | 1.90 |
| CP5 | 3911  | 1.39 |
| CP6 | 5205  | 1.37 |

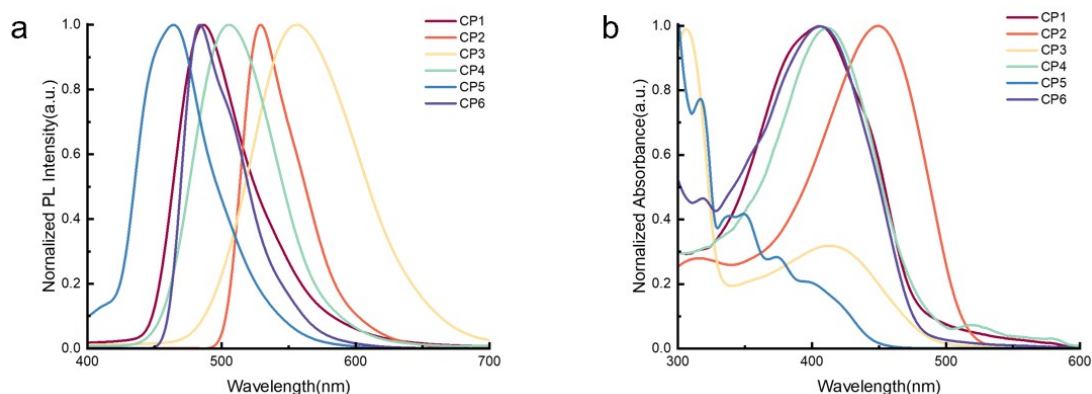

Fig. S1 (a) Normalized fluorescent emission spectra of 6 CPs. (b) Normalized UV-Vis absorption spectra of 6 CPs

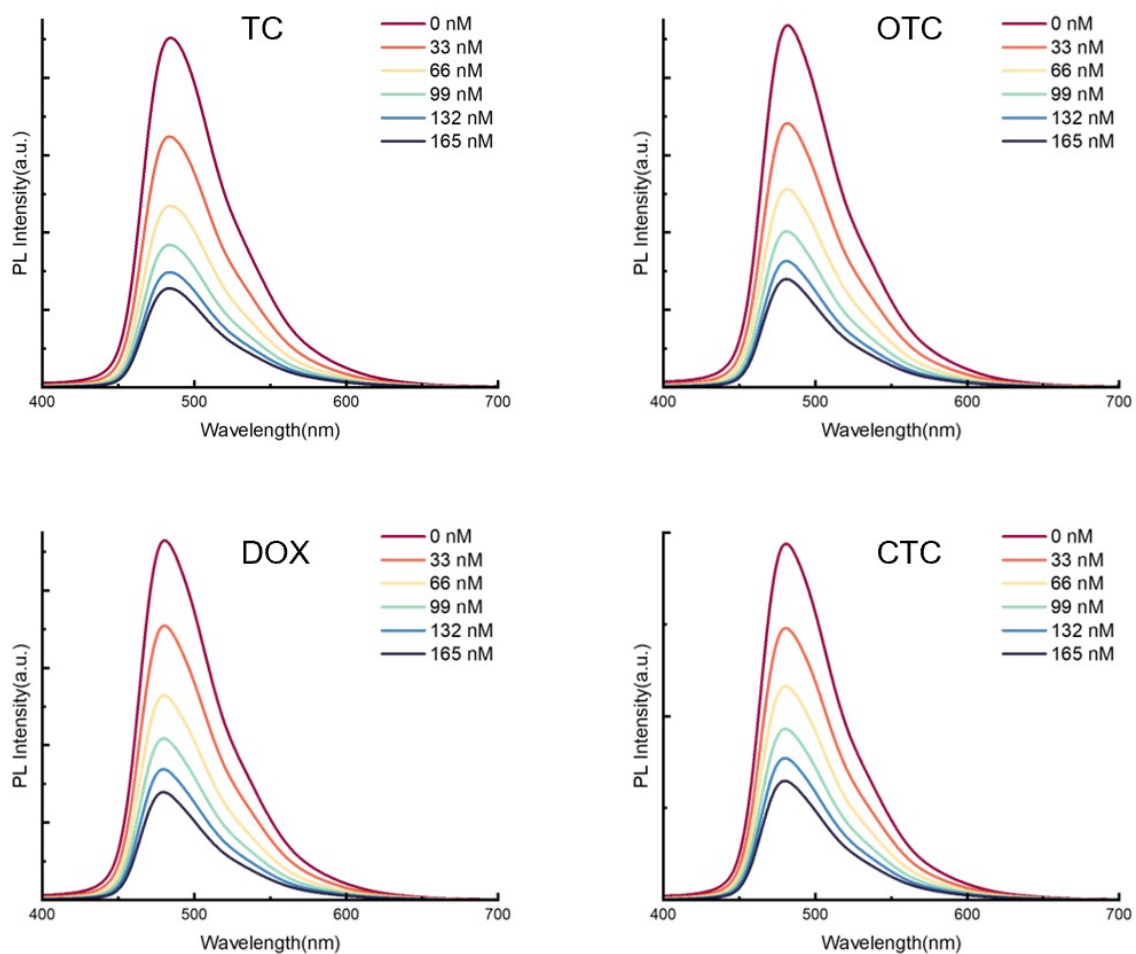

Fig. S2 Fluorescence quenching titration experiments for CP1 with TCs

Table S2 Fluorescent response pattern  $(I-I_0)/I_0$

| Analytes | c ( $\mu$ M) | CP1     | CP2     | CP3     | CP4     | CP5     | CP6     |
|----------|--------------|---------|---------|---------|---------|---------|---------|
| TC       | 33           | -0.2876 | -0.3706 | -0.4408 | -0.3789 | -0.3468 | -0.1992 |
| TC       | 33           | -0.2982 | -0.3456 | -0.4423 | -0.3650 | -0.4056 | -0.1676 |
| TC       | 33           | -0.2928 | -0.3550 | -0.4199 | -0.3615 | -0.3866 | -0.1616 |
| TC       | 33           | -0.3088 | -0.3532 | -0.4244 | -0.3726 | -0.3746 | -0.1556 |
| TC       | 33           | -0.2787 | -0.3624 | -0.4157 | -0.3655 | -0.3659 | -0.1637 |
| TC       | 66           | -0.4820 | -0.6032 | -0.6754 | -0.5992 | -0.6214 | -0.3398 |
| TC       | 66           | -0.4902 | -0.5746 | -0.6850 | -0.5807 | -0.6148 | -0.3332 |
| TC       | 66           | -0.4761 | -0.6000 | -0.6696 | -0.5912 | -0.6220 | -0.3168 |
| TC       | 66           | -0.4839 | -0.5973 | -0.6711 | -0.5983 | -0.5983 | -0.3303 |
| TC       | 66           | -0.4756 | -0.5920 | -0.6638 | -0.5844 | -0.5970 | -0.2951 |
| TC       | 99           | -0.5933 | -0.7341 | -0.8092 | -0.7364 | -0.7475 | -0.4166 |
| TC       | 99           | -0.5904 | -0.7136 | -0.8147 | -0.7243 | -0.7371 | -0.4225 |
| TC       | 99           | -0.5950 | -0.7302 | -0.8042 | -0.7332 | -0.7468 | -0.4140 |

|     |     |         |         |         |         |         |         |
|-----|-----|---------|---------|---------|---------|---------|---------|
| TC  | 99  | -0.6045 | -0.7241 | -0.8045 | -0.7324 | -0.7419 | -0.4294 |
| TC  | 99  | -0.5914 | -0.7271 | -0.7980 | -0.7206 | -0.7370 | -0.4086 |
| TC  | 132 | -0.6730 | -0.8152 | -0.8811 | -0.8207 | -0.8232 | -0.5189 |
| TC  | 132 | -0.6696 | -0.7990 | -0.8890 | -0.8092 | -0.8244 | -0.5142 |
| TC  | 132 | -0.6684 | -0.8095 | -0.8763 | -0.8160 | -0.8231 | -0.4978 |
| TC  | 132 | -0.6814 | -0.8064 | -0.8790 | -0.8161 | -0.8109 | -0.5074 |
| TC  | 132 | -0.6625 | -0.8117 | -0.8759 | -0.8053 | -0.8126 | -0.4592 |
| TC  | 165 | -0.7189 | -0.8655 | -0.9246 | -0.8712 | -0.8707 | -0.5571 |
| TC  | 165 | -0.7137 | -0.8530 | -0.9280 | -0.8634 | -0.8689 | -0.5496 |
| TC  | 165 | -0.7146 | -0.8545 | -0.9227 | -0.8685 | -0.8692 | -0.5527 |
| TC  | 165 | -0.7233 | -0.8615 | -0.9237 | -0.8687 | -0.8633 | -0.5719 |
| TC  | 165 | -0.7068 | -0.8607 | -0.9192 | -0.8614 | -0.8613 | -0.5363 |
| OTC | 33  | -0.2693 | -0.3606 | -0.3877 | -0.3791 | -0.3707 | -0.1919 |
| OTC | 33  | -0.2714 | -0.3396 | -0.3662 | -0.3859 | -0.3586 | -0.1970 |
| OTC | 33  | -0.2654 | -0.3360 | -0.3741 | -0.3883 | -0.3610 | -0.1890 |
| OTC | 33  | -0.2689 | -0.3419 | -0.3732 | -0.3855 | -0.3617 | -0.1911 |
| OTC | 33  | -0.2599 | -0.3407 | -0.3588 | -0.3773 | -0.3606 | -0.1972 |
| OTC | 66  | -0.4498 | -0.5422 | -0.6151 | -0.6109 | -0.5849 | -0.3120 |
| OTC | 66  | -0.4435 | -0.5433 | -0.6157 | -0.6120 | -0.5613 | -0.3072 |
| OTC | 66  | -0.4426 | -0.5504 | -0.6229 | -0.6161 | -0.5717 | -0.2987 |
| OTC | 66  | -0.4505 | -0.5551 | -0.6196 | -0.6083 | -0.5713 | -0.3144 |
| OTC | 66  | -0.4458 | -0.5492 | -0.6137 | -0.6097 | -0.5767 | -0.3123 |
| OTC | 99  | -0.5709 | -0.6889 | -0.7763 | -0.7508 | -0.7161 | -0.3995 |
| OTC | 99  | -0.5663 | -0.6827 | -0.7638 | -0.7449 | -0.6940 | -0.3899 |
| OTC | 99  | -0.5597 | -0.6875 | -0.7876 | -0.7526 | -0.7026 | -0.3879 |
| OTC | 99  | -0.5672 | -0.6859 | -0.7687 | -0.7435 | -0.6928 | -0.3914 |
| OTC | 99  | -0.5624 | -0.6861 | -0.7668 | -0.7501 | -0.6953 | -0.4030 |
| OTC | 132 | -0.6515 | -0.7768 | -0.8577 | -0.8327 | -0.7854 | -0.4646 |
| OTC | 132 | -0.6415 | -0.7677 | -0.8547 | -0.8284 | -0.7725 | -0.4561 |
| OTC | 132 | -0.6395 | -0.7746 | -0.8679 | -0.8293 | -0.7761 | -0.4561 |
| OTC | 132 | -0.6403 | -0.7768 | -0.8538 | -0.8280 | -0.7805 | -0.4501 |
| OTC | 132 | -0.6419 | -0.7747 | -0.8553 | -0.8313 | -0.7919 | -0.4647 |
| OTC | 165 | -0.7022 | -0.8261 | -0.9034 | -0.8842 | -0.8442 | -0.5147 |
| OTC | 165 | -0.6938 | -0.8269 | -0.9007 | -0.8799 | -0.8368 | -0.5039 |
| OTC | 165 | -0.6930 | -0.8317 | -0.9128 | -0.8816 | -0.8394 | -0.5080 |
| OTC | 165 | -0.6949 | -0.8333 | -0.9029 | -0.8821 | -0.8382 | -0.5056 |
| DOX | 165 | -0.6954 | -0.8357 | -0.9035 | -0.8845 | -0.8440 | -0.5123 |
| DOX | 33  | -0.2352 | -0.3833 | -0.4153 | -0.3945 | -0.3676 | -0.1923 |
| DOX | 33  | -0.2561 | -0.3528 | -0.3844 | -0.3997 | -0.3635 | -0.2059 |
| DOX | 33  | -0.2652 | -0.3454 | -0.3837 | -0.3972 | -0.3619 | -0.1653 |
| DOX | 33  | -0.2728 | -0.3636 | -0.3895 | -0.3674 | -0.3662 | -0.1232 |
| DOX | 33  | -0.2636 | -0.3225 | -0.3764 | -0.3599 | -0.3679 | -0.1289 |

|     |     |         |         |         |         |         |         |
|-----|-----|---------|---------|---------|---------|---------|---------|
| DOX | 66  | -0.4336 | -0.5788 | -0.6487 | -0.6195 | -0.5721 | -0.3163 |
| DOX | 66  | -0.4516 | -0.5670 | -0.6381 | -0.6217 | -0.5799 | -0.3064 |
| DOX | 66  | -0.4458 | -0.5739 | -0.6293 | -0.6204 | -0.5739 | -0.3092 |
| DOX | 66  | -0.4532 | -0.5719 | -0.6330 | -0.6022 | -0.5685 | -0.2870 |
| DOX | 66  | -0.4405 | -0.5628 | -0.6270 | -0.5979 | -0.5757 | -0.2773 |
| DOX | 99  | -0.5493 | -0.7154 | -0.7829 | -0.7497 | -0.7084 | -0.3910 |
| DOX | 99  | -0.5628 | -0.7123 | -0.7736 | -0.7467 | -0.7090 | -0.3884 |
| DOX | 99  | -0.5703 | -0.7102 | -0.7643 | -0.7465 | -0.7049 | -0.4219 |
| DOX | 99  | -0.5751 | -0.7032 | -0.7671 | -0.7435 | -0.7033 | -0.3766 |
| DOX | 99  | -0.5668 | -0.6919 | -0.7548 | -0.7413 | -0.7109 | -0.3723 |
| DOX | 132 | -0.6360 | -0.7926 | -0.8551 | -0.8336 | -0.7941 | -0.4667 |
| DOX | 132 | -0.6427 | -0.7934 | -0.8475 | -0.8278 | -0.7924 | -0.4542 |
| DOX | 132 | -0.6491 | -0.7875 | -0.8497 | -0.8293 | -0.7966 | -0.4626 |
| DOX | 132 | -0.6599 | -0.7947 | -0.8491 | -0.8276 | -0.7932 | -0.4390 |
| DOX | 132 | -0.6499 | -0.7829 | -0.8399 | -0.8149 | -0.7952 | -0.4298 |
| DOX | 165 | -0.7004 | -0.8434 | -0.8988 | -0.8781 | -0.8459 | -0.5102 |
| DOX | 165 | -0.7027 | -0.8459 | -0.8986 | -0.8751 | -0.8465 | -0.5043 |
| DOX | 165 | -0.6965 | -0.8411 | -0.8970 | -0.8778 | -0.8431 | -0.5178 |
| DOX | 165 | -0.7077 | -0.8432 | -0.9011 | -0.8750 | -0.8470 | -0.4890 |
| DOX | 165 | -0.7021 | -0.8354 | -0.8930 | -0.8681 | -0.8478 | -0.4844 |
| CTC | 33  | -0.2446 | -0.3002 | -0.3542 | -0.3381 | -0.3515 | -0.1484 |
| CTC | 33  | -0.2407 | -0.2885 | -0.3407 | -0.3807 | -0.3427 | -0.1360 |
| CTC | 33  | -0.2330 | -0.3181 | -0.3168 | -0.3513 | -0.3382 | -0.1404 |
| CTC | 33  | -0.2258 | -0.2742 | -0.3361 | -0.3485 | -0.3374 | -0.1536 |
| CTC | 33  | -0.2346 | -0.3126 | -0.3530 | -0.3129 | -0.3339 | -0.1623 |
| CTC | 66  | -0.4048 | -0.5282 | -0.5919 | -0.5456 | -0.5559 | -0.2712 |
| CTC | 66  | -0.3989 | -0.4991 | -0.5620 | -0.5835 | -0.5469 | -0.2543 |
| CTC | 66  | -0.3876 | -0.5161 | -0.5466 | -0.5549 | -0.5420 | -0.2478 |
| CTC | 66  | -0.3989 | -0.4877 | -0.5698 | -0.5769 | -0.5710 | -0.2521 |
| CTC | 66  | -0.4026 | -0.5069 | -0.5498 | -0.5548 | -0.5502 | -0.2636 |
| CTC | 99  | -0.5233 | -0.6527 | -0.7185 | -0.6923 | -0.6892 | -0.3532 |
| CTC | 99  | -0.5318 | -0.6396 | -0.7063 | -0.7224 | -0.6779 | -0.3449 |
| CTC | 99  | -0.5024 | -0.6466 | -0.6914 | -0.7080 | -0.6903 | -0.3368 |
| CTC | 99  | -0.5139 | -0.6313 | -0.7124 | -0.7090 | -0.7037 | -0.3376 |
| CTC | 99  | -0.5284 | -0.6463 | -0.6926 | -0.6913 | -0.6826 | -0.3401 |
| CTC | 132 | -0.6066 | -0.7490 | -0.8135 | -0.7818 | -0.7804 | -0.4137 |
| CTC | 132 | -0.6096 | -0.7422 | -0.7974 | -0.7983 | -0.7803 | -0.4036 |
| CTC | 132 | -0.6017 | -0.7427 | -0.7881 | -0.7894 | -0.7828 | -0.4087 |
| CTC | 132 | -0.6088 | -0.7438 | -0.7988 | -0.7942 | -0.7960 | -0.4002 |
| CTC | 132 | -0.6182 | -0.7511 | -0.7674 | -0.7787 | -0.7755 | -0.4042 |
| CTC | 165 | -0.6663 | -0.8175 | -0.8625 | -0.8370 | -0.8314 | -0.4681 |
| CTC | 165 | -0.6592 | -0.8041 | -0.8570 | -0.8526 | -0.8295 | -0.4709 |

---

|     |     |         |         |         |         |         |         |
|-----|-----|---------|---------|---------|---------|---------|---------|
| CTC | 165 | -0.6573 | -0.8117 | -0.8504 | -0.8365 | -0.8337 | -0.4738 |
| CTC | 165 | -0.6538 | -0.8005 | -0.8558 | -0.8552 | -0.8483 | -0.4619 |
| CTC | 165 | -0.6717 | -0.8063 | -0.8259 | -0.8376 | -0.8339 | -0.4540 |
